# Supplementary material
Source: ML conference proceedings conference paper supplement (https://proceedings.mlr.press/v32/rey14.html)
Supplement: Supplementary file 1 [file rey14-supp.zip]

Archive with 9 entries (6 files):
- Supplementary-material-FINAL/
- Supplementary-material-FINAL/Copula_Estimation.R
- __MACOSX/
- __MACOSX/Supplementary-material-FINAL/
- __MACOSX/Supplementary-material-FINAL/._Copula_Estimation.R
- Supplementary-material-FINAL/Sparse_MMGIB_optimisation.R
- __MACOSX/Supplementary-material-FINAL/._Sparse_MMGIB_optimisation.R
- Supplementary-material-FINAL/Supplementary-material_FINAL.pdf
- __MACOSX/._Supplementary-material-FINAL
